# Supplementary material for: O-Glycan-Altered Extracellular Vesicles: A Specific Serum Marker Elevated in Pancreatic Cancer
Source: PubMed Central journal article supplement (PMC7563872; doi:10.3390/cancers12092469), 2020-08-31

## Supplementary Materials: O-Glycan-Altered Extracellular vesicles: A Specific Serum Marker Elevated in Pancreatic Cancer

Takahiro Yokose, Yasuaki Kabe, Atsushi Matsuda, Minoru Kitago, Sachiko Matsuda, Miwa Hirai, Tomomi Nakagawa, Yohei Masugi, Yuki Nakamura, Masahiro Shinoda, Hiroshi Yagi, Yuta Abe, Go Oshima, Shutaro Hori, Yutaka Nakano, Kazufumi Honda, Ayumi Kashiro, Chigusa Morizane, Satoshi Nara, Shojiro Kikuchi, Takahiko Shibahara, Makoto Itonaga, Masayuki Ono, Atsushi Kuno, Hiroshi Handa, Michiie Sakamoto, Makoto Suematsu, Yuko Kitagawa

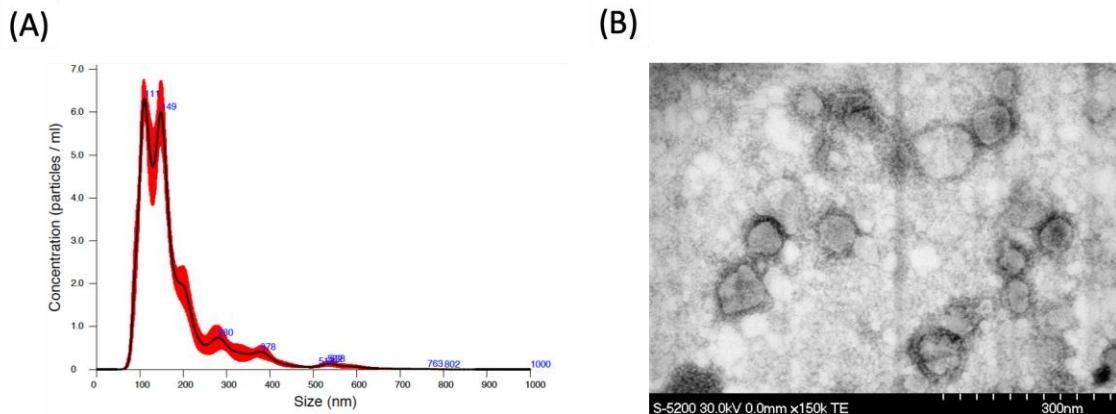

**Figure S1.** Validation of the EVs isolated from PC sera using Magcapture. (A) Size distribution of the isolated EVs analysed with NanoSight. (B) Validation of the isolated EVs analysed with STEM.

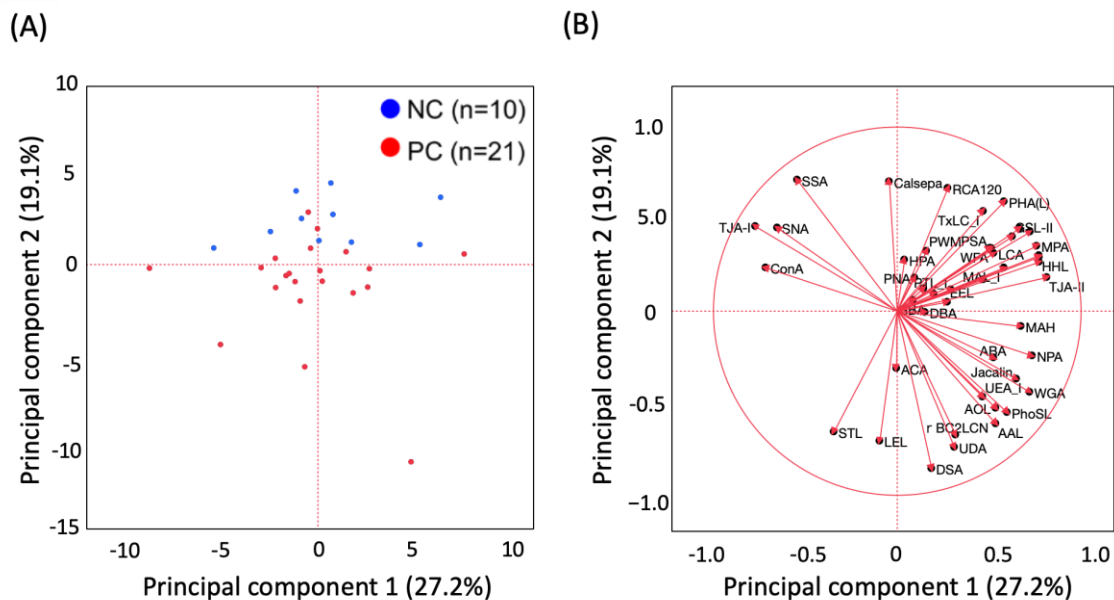

**Figure S2.** Profiling of the EVs containing specific glycans in PC sera with lectin microarray. EVs in PC ( $n = 21$ ) or NC ( $n = 10$ ) sera were isolated with Magcapture Exosome Isolation Kit and then labeled with Cy3-succinidyl ester. The labeled EVs were analyzed with lectin microarray immobilized with 45 lectins. The 2D plots shows the principal component analysis of glycan profiling. NC and PC are indicated in blue and red, respectively. Relative intensity of 45 lectins shown as a biplot.

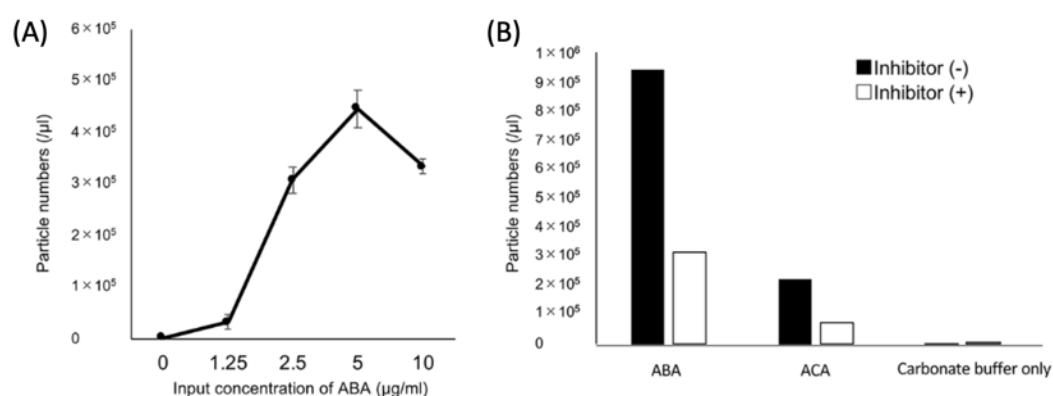

**Figure S3.** Optimization of ExoCounter system using lectin. **(A)** EVs in BxPC3 cell culture ( $n = 3$ ) were analyzed using discs coated with ABA and anti-CD9 Ab-conjugated beads. The concentration of ABA lectin for disc coating was changed from 0 to 10 µg/mL. **(B)** EVs in BxPC3 cell culture medium were analyzed using discs coated with or without ABA or ACA and anti-CD9 Ab-conjugated beads with ExoCounter. Excess carbohydrates 0.2mM sialyl lactose or 0.2M lactose for inhibiting ABA or ACA, respectively, were added when blocking and injecting sample solutions into each well.

**Table S1.** Lectin microarray analysis.

| Lectins | Study 1                 |                |                      |         | Study 2                 |                |                            |
|---------|-------------------------|----------------|----------------------|---------|-------------------------|----------------|----------------------------|
|         | Mean normalized signals |                | Tumor / Normal ratio | p value | Mean normalized signals |                | Pre / Post operative ratio |
|         | Pancreatic cancer       | Normal control |                      |         | Pre operative           | Post operative |                            |
| LTL     | 0.002                   | 0.001          | 1.894                | 0.324   | 0.006                   | 0.004          | 1.692                      |
| PSA     | 0.233                   | 0.242          | 0.965                | 0.655   | 0.321                   | 0.365          | 0.878                      |
| LCA     | 0.390                   | 0.434          | 0.898                | 0.186   | 0.519                   | 0.636          | 0.816                      |
| UEA_I   | 0.018                   | 0.016          | 1.088                | 0.857   | 0.037                   | 0.022          | 1.667                      |
| AOL     | 0.103                   | 0.105          | 0.981                | 0.952   | 0.196                   | 0.119          | 1.654                      |
| AAL     | 0.506                   | 0.452          | 1.119                | 0.443   | 0.595                   | 0.538          | 1.107                      |
| MAL_I   | 0.079                   | 0.101          | 0.779                | 0.220   | 0.119                   | 0.092          | 1.294                      |
| SNA     | 4.636                   | 4.827          | 0.960                | 0.489   | 3.765                   | 3.144          | 1.197                      |
| SSA     | 4.961                   | 6.052          | 0.820                | <0.001  | 4.338                   | 3.956          | 1.097                      |
| TJA-I   | 8.492                   | 8.691          | 0.977                | 0.564   | 7.388                   | 6.747          | 1.095                      |
| PHA(L)  | 0.048                   | 0.094          | 0.508                | 0.030   | 0.094                   | 0.078          | 1.201                      |
| ECA     | 0.061                   | 0.072          | 0.842                | 0.573   | 0.123                   | 0.148          | 0.828                      |
| RCA120  | 2.043                   | 2.267          | 0.901                | 0.027   | 2.143                   | 1.966          | 1.090                      |
| PHA(E)  | 0.898                   | 1.103          | 0.814                | 0.085   | 1.165                   | 1.214          | 0.959                      |
| DSA     | 2.746                   | 1.997          | 1.375                | <0.001  | 2.773                   | 2.909          | 0.953                      |
| GSL-II  | 0.005                   | 0.017          | 0.291                | 0.045   | 0.033                   | 0.034          | 0.977                      |

|         |       |       |       |        |       |       |       |
|---------|-------|-------|-------|--------|-------|-------|-------|
| NPA     | 0.468 | 0.467 | 1.001 | 0.995  | 0.597 | 0.725 | 0.823 |
| ConA    | 2.018 | 1.986 | 1.016 | 0.848  | 1.478 | 1.901 | 0.778 |
| GNA     | 0.110 | 0.124 | 0.890 | 0.483  | 0.229 | 0.222 | 1.032 |
| HHL     | 0.125 | 0.154 | 0.815 | 0.324  | 0.273 | 0.232 | 1.175 |
| ACG     | 1.144 | 1.273 | 0.899 | 0.157  | 1.220 | 1.007 | 1.211 |
| TxLC_I  | 1.378 | 1.805 | 0.764 | 0.009  | 1.980 | 1.944 | 1.019 |
| BPL     | 0.007 | 0.012 | 0.615 | 0.282  | 0.024 | 0.016 | 1.521 |
| TJA-II  | 0.522 | 0.578 | 0.904 | 0.354  | 0.828 | 0.720 | 1.150 |
| EEL     | 0.010 | 0.008 | 1.149 | 0.863  | 0.023 | 0.021 | 1.090 |
| ABA     | 0.707 | 0.570 | 1.239 | 0.063  | 0.683 | 0.492 | 1.387 |
| LEL     | 2.837 | 2.223 | 1.276 | 0.001  | 2.976 | 3.436 | 0.866 |
| STL     | 2.398 | 1.666 | 1.440 | <0.001 | 2.193 | 2.666 | 0.822 |
| UDA     | 2.891 | 2.471 | 1.170 | 0.011  | 3.266 | 4.190 | 0.780 |
| PWM     | 0.004 | 0.006 | 0.675 | 0.622  | 0.016 | 0.020 | 0.796 |
| Jacalin | 0.796 | 0.739 | 1.077 | 0.533  | 0.802 | 0.683 | 1.174 |
| PNA     | 0.000 | 0.001 | 0.488 | 0.643  | 0.000 | 0.000 | 0.867 |
| WFA     | 0.003 | 0.017 | 0.154 | 0.191  | 0.015 | 0.004 | 3.576 |
| ACA     | 0.522 | 0.435 | 1.199 | 0.058  | 0.535 | 0.455 | 1.175 |
| MPA     | 0.062 | 0.099 | 0.624 | 0.040  | 0.139 | 0.094 | 1.470 |
| HPA     | 0.000 | 0.001 | 0.000 | 0.343  | 0.000 | 0.000 | ND    |
| VVA     | 0.004 | 0.007 | 0.512 | 0.508  | 0.004 | 0.001 | 5.396 |
| DBA     | 0.001 | 0.000 | ND    | 0.148  | 0.000 | 0.000 | ND    |
| SBA     | 0.002 | 0.001 | 2.716 | 0.473  | 0.001 | 0.004 | 0.289 |
| Calsepa | 1.389 | 1.736 | 0.800 | 0.012  | 1.363 | 1.293 | 1.054 |
| PTL_I   | 0.001 | 0.000 | 2.954 | 0.411  | 0.002 | 0.000 | ND    |
| MAH     | 0.133 | 0.117 | 1.142 | 0.438  | 0.167 | 0.143 | 1.170 |
| WGA     | 0.909 | 0.804 | 1.131 | 0.322  | 1.027 | 1.062 | 0.968 |
| rBC2LCN | 0.008 | 0.001 | 9.813 | 0.237  | 0.016 | 0.013 | 1.217 |
| PhoSL   | 1.333 | 1.230 | 1.084 | 0.439  | 1.527 | 1.682 | 0.908 |

---

ND, not determined

**Table S2.** Patient characteristics of cohort 1 and 2.

| Parameter                      | Cohort 1    |                  | Cohort 2      |                  |
|--------------------------------|-------------|------------------|---------------|------------------|
|                                | PC (n = 68) | Control (n = 77) | PC (n = 49)   | Control (n = 21) |
| Age, y [median (range)]        | 71(43–85)   | 49 (30–72)       | 68 (38–86)    | 53 (42–86)       |
| Sex                            |             |                  |               |                  |
| Male                           | 37          | 19               | 26            | 9                |
| Female                         | 31          | 8                | 23            | 12               |
| CA19-9, IU/mL [median (range)] | 54 (1–2392) |                  | 186 (1–36800) |                  |
| Neoadjuvant treatment          | 0           |                  | 0             |                  |
| Tumor location                 |             |                  |               |                  |
| Head                           | 39          |                  |               |                  |
| Body or tail                   | 29          |                  |               |                  |
| Primary tumor status           |             |                  |               |                  |
| T1                             | 15          |                  |               |                  |
| T2                             | 45          |                  |               |                  |
| T3                             | 8           |                  |               |                  |
| Lymph node metastasis status   |             |                  |               |                  |
| N0                             | 17          |                  |               |                  |
| N1                             | 28          |                  |               |                  |
| N2                             | 23          |                  |               |                  |
| Pathological stage             |             |                  |               |                  |
| IA                             | 8           |                  | 2             |                  |
| IB                             | 8           |                  | 6             |                  |
| IIA                            | 0           |                  | 0             |                  |
| IIB                            | 27          |                  | 8             |                  |
| III                            | 21          |                  | 10            |                  |
| IV                             | 4           |                  | 23            |                  |

PC, pancreatic cancer; CA19-9, carbohydrate antigen 19-9

**Table S3.** The abbreviations and glycan binding specificity of 45 lectins immobilized onto LecChip used in this study

|    | Lectins | Origin                        | Binding specificity                                             |
|----|---------|-------------------------------|-----------------------------------------------------------------|
| 1  | LTL     | <i>Lotus tetragonobus</i>     | Fuca1-3GlcNAc, Sia-Le <sup>x</sup> and Le <sup>x</sup>          |
| 2  | PSA     | <i>Pisum sativum</i>          | Fuca1-6GlcNAc and $\alpha$ -Man                                 |
| 3  | LCA     | <i>Lens culinaris</i>         | Fuca1-6GlcNAc and $\alpha$ -Man, $\alpha$ -Glc                  |
| 4  | UEA-I   | <i>Ulex europaeus</i>         | Fuca1-2LacNAc                                                   |
| 5  | AOL     | <i>Aspergillus oryzae</i>     | Terminal $\alpha$ -Fuc, Sia-Le <sup>x</sup> and Le <sup>x</sup> |
| 6  | AAL     | <i>Aleuria aurantia</i>       | Terminal $\alpha$ -Fuc, Sia-Le <sup>x</sup> and Le <sup>x</sup> |
| 7  | MAL     | <i>Maackia amurensis</i>      | Sia $\alpha$ 2-3Gal                                             |
| 8  | SNA     | <i>Sambucus nigra</i>         | Sia $\alpha$ 2-6Gal/GalNAc                                      |
| 9  | SSA     | <i>Sambucus sieboldiana</i>   | Sia $\alpha$ 2-6Gal/GalNAc                                      |
| 10 | TJA-I   | <i>Trichosanthes japonica</i> | Sia $\alpha$ 2-6Gal $\beta$ 1-4GlcNAc $\beta$ -R                |
| 11 | PHA-L   | <i>Phaseolus vulgaris</i>     | Tri- and tetra-antennary complex oligosaccharides               |
| 12 | ECA     | <i>Erythrina cristagalli</i>  | Lac/LacNAc                                                      |
| 13 | RCA120  | <i>Ricinus communis</i>       | Lac/LacNAc                                                      |
| 14 | PHA-E   | <i>Phaseolus vulgaris</i>     | NA <sub>2</sub> and bisecting GlcNAc                            |

|    |         |                                    |                                                                                    |
|----|---------|------------------------------------|------------------------------------------------------------------------------------|
| 15 | DSA     | <i>Datura stramonium</i>           | (GlcNAc) <sub>n</sub> , polyLacNAc and LacNAc (NA <sub>3</sub> , NA <sub>4</sub> ) |
| 16 | GSL-II  | <i>Griffonia simplicifolia</i>     | Agalactosylated N-glycan                                                           |
| 17 | NPA     | <i>Narcissus pseudonarcissus</i>   | Non-substituted α1-6Man                                                            |
| 18 | ConA    | <i>Canavalia ensiformis</i>        | α1-6Man (inhibited by presence of bisecting GlcNAc)                                |
| 19 | GNA     | <i>Galanthus nivalis</i>           | Non-substituted α1-6Man                                                            |
| 20 | HHL     | <i>Hippeastrum Hybrid</i>          | Non-substituted α1-6Man                                                            |
| 21 | ACG     | <i>Agrocybe cylindracea</i>        | Siaα2-3Galβ1-4 GlcNAc                                                              |
| 22 | TxLC-I  | <i>Tulipa gesneriana</i>           | Man3 core, bi- and tri-antennary complex-type N-glycan, GalNAc                     |
| 23 | BPL     | <i>Bauhinia purpurea</i>           | Galβ1-3GalNAc and NA <sub>3</sub> , NA <sub>4</sub>                                |
| 24 | TJA-II  | <i>Trichosanthes japonica</i>      | Fuca1-2Gal, β-GalNAc > NA <sub>3</sub> , NA <sub>4</sub>                           |
| 25 | EEL     | <i>Euonymus europaeus</i>          | Galα1-3[Fuca1-2 Gal] > Galα1-3 Gal                                                 |
| 26 | ABA     | <i>Agaricus bisporus</i>           | Galβ1-3GalNAcα-Thr/Ser (T) and sialyl-T                                            |
| 27 | LEL     | <i>Lycopersicon esculentum</i>     | (GlcNAc) <sub>n</sub> and polyLacNAc                                               |
| 28 | STL     | <i>Solanum tuberosum</i>           | (GlcNAc) <sub>n</sub> and polyLacNAc                                               |
| 29 | UDA     | <i>Urtica dioica</i>               | (GlcNAc) <sub>n</sub> and polyLacNAc                                               |
| 30 | PWM     | <i>Phytolacca americana</i>        | (GlcNAc) <sub>n</sub> and polyLacNAc                                               |
| 31 | Jacalin | <i>Artocarpus integrifolia</i>     | Galβ1-3GalNAcα-Thr/Ser (T) and GalNAcα-Thr/Ser (Tn)                                |
| 32 | PNA     | <i>Arachis hypogaea</i>            | Galβ1-3GalNAcα-Thr/Ser (T)                                                         |
| 33 | WFA     | <i>Wisteria floribunda</i>         | Terminal GalNAc (e.g., GalNAc@1-4GlcNAc)                                           |
| 34 | ACA     | <i>Amaranthus caudatus</i>         | Galβ1-3GalNAcα-Thr/Ser (T)                                                         |
| 35 | MPA     | <i>Maclura pomifera</i>            | Galβ1-3GalNAcα-Thr/Ser (T) and GalNAcα-Thr/Ser (Tn)                                |
| 36 | HPA     | <i>Helix pomatia</i>               | Terminal GalNAc                                                                    |
| 37 | VVA     | <i>Vicia villosa</i>               | α-, β-linked terminal GalNAc and GalNAcα-Thr/Ser (Tn)                              |
| 38 | DBA     | <i>Dolichos biflorus</i>           | GalNAcα-Thr/Ser (Tn) and GalNAcα1-3GalNAc                                          |
| 39 | SBA     | <i>Glycine max</i>                 | Terminal GalNAc (especially GalNAcα1-3Gal)                                         |
| 40 | Calsepa | <i>Calystegia sepium</i>           | Man, Maltose                                                                       |
| 41 | PTL-I   | <i>Psophocarpus tetragonolobus</i> | α-GalNAc and Gal                                                                   |
| 42 | MAH     | <i>Maackia amurensis</i>           | Siaα2-3Galβ1-3[Sia@2-6GalNAc] α-R                                                  |
| 43 | WGA     | <i>Triticum aestivum</i>           | (GlcNAc) <sub>n</sub> and multivalent Sia                                          |
| 44 | BC2LCN  | <i>Griffonia Simplicifolia</i>     | Fuca1-2Gal (H type 1 or 3)                                                         |
| 45 | PhoSL   | <i>Griffonia Simplicifolia</i>     | Fuca1-6(Core fucose)                                                               |

Binding specificities are summarized from LfDB (Lectin frontier Fatabase; <http://riodb.ibase.aist.go.jp/rcmg/glycodb/LectinSerch>)

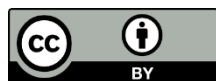

Supplement: cancers-12-02469-s001.pdf [file cancers-12-02469-s001.pdf]
